# Supplementary material for: Self-healable triboelectric nanogenerators based on ionic poly(hindered urea) network materials cross-linked with fluorinated block copolymers
Source: Royal Society of Chemistry journal article supplement (doi:10.1039/d2py00252c), 2022-01-01

## Supporting Information

### Self-healable Triboelectric Nanogenerators based on Ionic Poly(Hindered Urea) Network Materials Cross-linked with Fluorinated Block Copolymers

Pothanagandhi Nallepalli,<sup>#ξ</sup> Twinkal Patel,<sup>#ξ</sup> Minsoo P. Kim,<sup>\$ξ</sup> Junyoung Park,<sup>δξ</sup> Zhibin Ye,<sup>@</sup> Hyun Wook Jung,<sup>δ\*</sup> Hyunhyub Ko,<sup>\$\$\*</sup> Jung Kwon Oh<sup>#\*</sup>

# Department of Chemistry and Biochemistry, Concordia University, Montreal, Quebec, Canada H4B 1R6

\$ School of Energy and Chemical Engineering, Ulsan National Institute of Science and Technology (UNIST), Ulsan 44919, Republic of Korea

δ Department of Chemical and Biological Engineering, Korea University, Seoul 02841, Republic of Korea

@ Department of Chemical and Materials Engineering, Concordia University, Montreal, Quebec H4B 1R6, Canada

ξ equally contributed to this work

Emails: [john.oh@concordia.ca](mailto:john.oh@concordia.ca); [hyunhko@unist.ac.kr](mailto:hyunhko@unist.ac.kr); [hwjung@grtrkr.korea.ac.kr](mailto:hwjung@grtrkr.korea.ac.kr)

**Figure S1.** Digital images of tensile specimens (a) as well as stress-strain curves before (b) and after (c) heating at 120 °C for 1 hr. Note that the blue-colored circles show the scratch made with a razor before and after annealing.

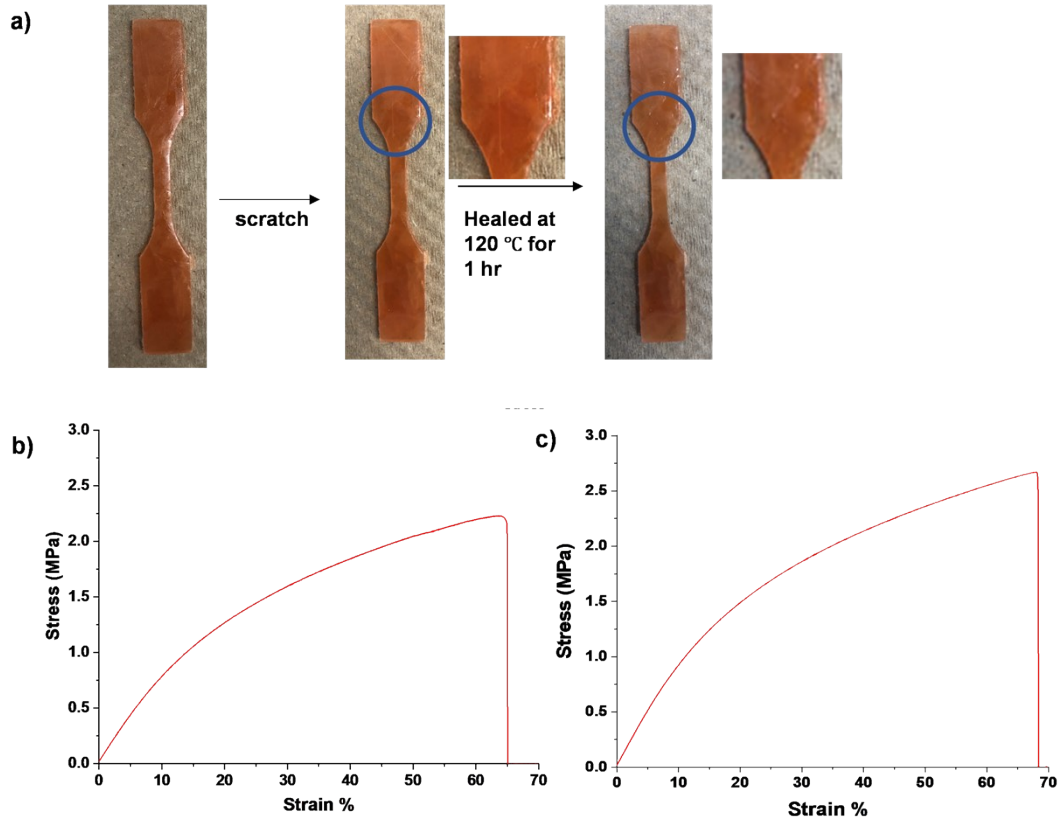

**Figure S2.** Comparison of temporal scratch profiles for iFBCP-PHU (a) and FBCP-PHU (b) films at 50 °C during annealing time of 1 day; Percent recovery data for two films (c).

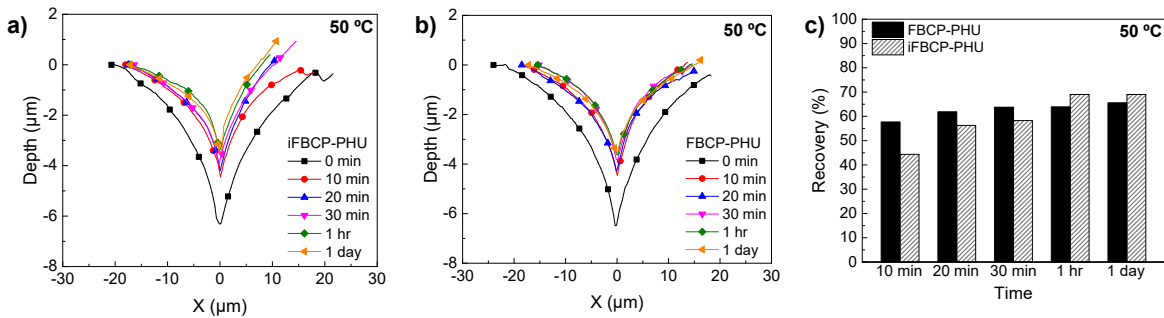

**Figure S3.** Scheme of the preparation process of a triboelectric device consisting of the FBCP-PHU and Al as negative and positive triboelectric layers, respectively.

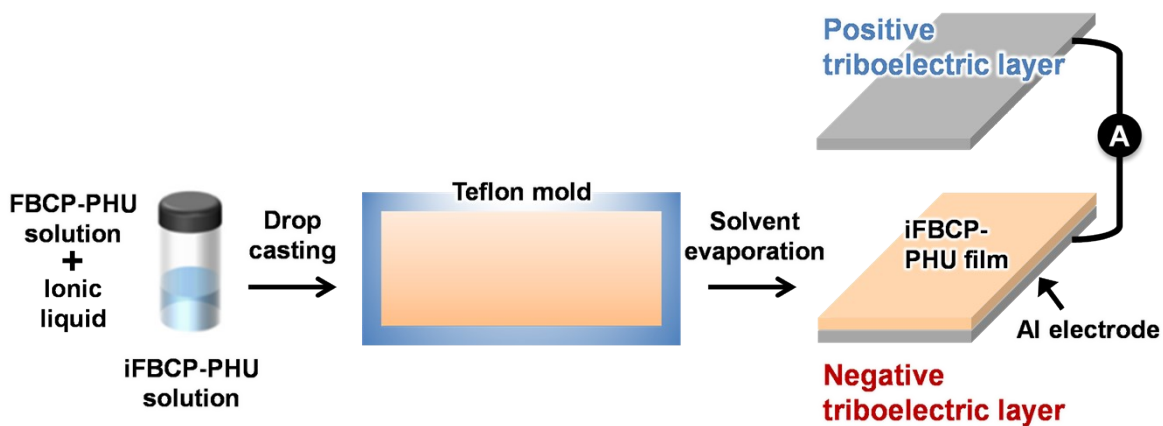

**Figure S4.** Triboelectric output current of FBCP-PHU without EMIM-TFSI after annealed at 150 °C for different time (a). Triboelectric output current of FBCP-PHU without and with EMIM-TFSI after annealed at 150°C for 10 min (b).

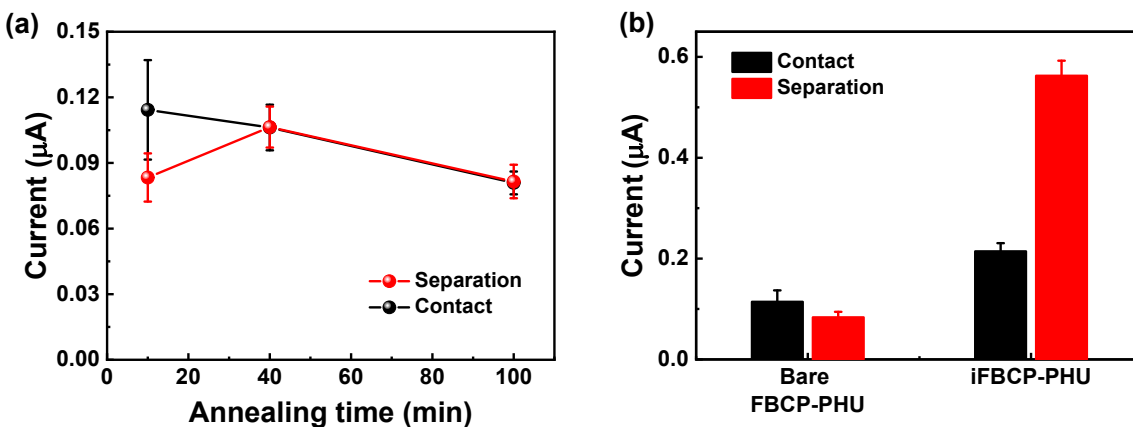

**Figure S5.** Triboelectric output current (a and d), voltage (b and e), and power density (c and f) of iFBCP-PHU under different mechanical force during separation (a-c) and contact (d-f) process, respectively.

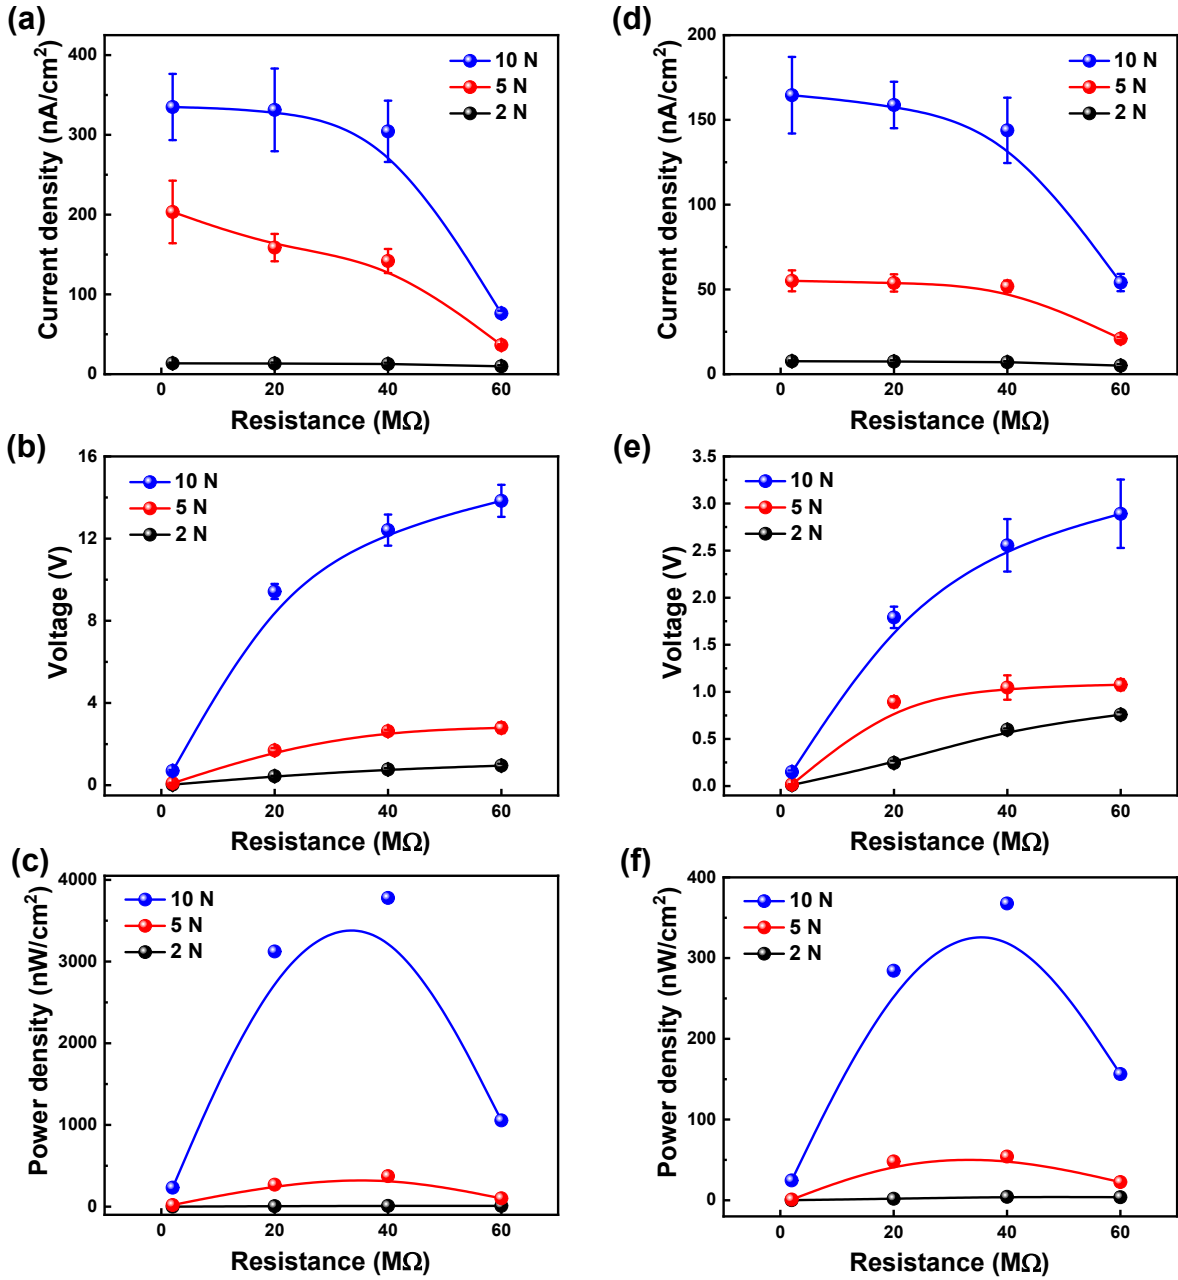

**Figure S6.** A repeated cycle test of iFBCP-PHU over 2000 cycles at 5 N and 2 Hz.

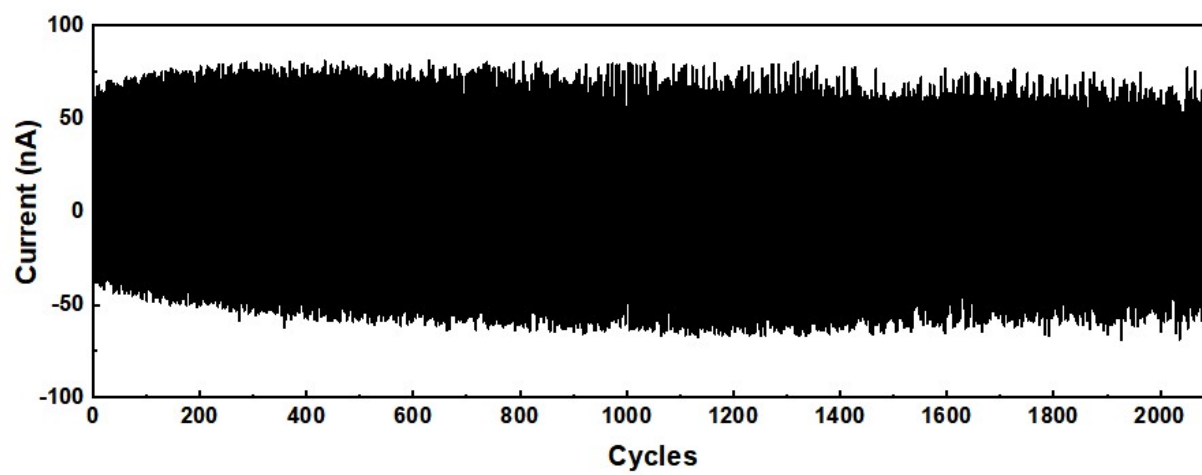

Supplement: d2py00252c1.pdf [file d2py00252c1.pdf]
